# Supplementary material for: SUPPRESSOR OF MAX2 LIKE 6, 7, and 8 Interact with DDB1 BINDING WD REPEAT DOMAIN HYPERSENSITIVE TO ABA DEFICIENT 1 to Regulate the Drought Tolerance and Target SUCROSE NONFERMENTING 1 RELATED PROTEIN KINASE 2.3 to Abscisic Acid Response in Arabidopsis
Source: Biomolecules. 2023 Sep 18;13(9):1406. doi: 10.3390/biom13091406 (PMC10526831; doi:10.3390/biom13091406)
Supplement: Supplementary file 1 [file biomolecules-13-01406-s001.zip › Table S1. Summary of primers used in this study.xlsx]

## Sheet: Sheet1
Primer Name	Sequence
Primers used in genotyping
smxl6 LP	AGCCAGAGAAAGACTCGAACC
smxl6 RP	TCAGATCCGAATCGTGAGTTC
smxl7 LP	CGTATTAGCCTCTCGGATTCC
smxl7 RP	GATCAAGAAACGAACGCTGAG
smxl8 LP	TAGCGAAACAATGCTTAACGG
smxl8 RP	TGGTGAGTAACTGCAAATCCC
dwa1-1 LP	ATGTACGGAGACGCTACAAA
dwa1-1 RP	TTACAATGAACTGCTACGAA
dwa1-2 LP	AAGCTAGTAATTTGATCGAC
dwa1-2 RP	TTCCATCCCCTAACTCTACC
snrk2.2 LP	CAAGACCATACATCTGCAAGCTGG
snrk2.2 RP	ACACCTTGATGTTTCTTCTGTGTG
snrk2.3 LP	TTGGTTTTGAGTGTTCTGCTTTTG
snrk2.3 RP	CACCACATGACCATACATCTGCAA
GABI-TDNA-LB	TTGACCATCATACTCATTGCTGATCC
LBb1.3	ATTTTGCCGATTTCGGAAC
LB2	GCTTCCTATTATATCTTCCCAAATTACCAATACA
Plasmind Constructs
Primers used in overexpression of SMXL6,7,8
pCAMBIA1300-SMXL6-F	CCAAATCGACTCTAGAATGCCGACGCCGGTGACT
pCAMBIA1300-SMXL6-R	CCACCACCGGATCCGGTACCCCATATCACATCCACCTTCGCC
pCAMBIA1300-SMXL7-F	CCAAATCGACTCTAGAATGCCGACACCAGTAACC
pCAMBIA1300-SMXL7-R	CCACCACCGGATCCGGTACCGATCACTTCGACTCTCGC
pCAMBIA1300-SMXL8-F	CCAAATCGACTCTAGAATGCCAACGGCGGTGAAT
pCAMBIA1300-SMXL8-R	CCACCACCGGATCCGGTACCCTGAGATTTTACAAAGAACAAGTCC
Y2H
pGBKT7-SMXL6-F	CATGGAGGCCGAATTCATGCCGACGCCGGTGACT
pGBKT7-SMXL6-R	GCAGGTCGACGGATCCCCATATCACATCCACCTTCGCC
pGBKT7-SMXL7-F	CATGGAGGCCGAATTCATGCCGACACCAGTAACC
pGBKT7-SMXL7-R	GCAGGTCGACGGATCCGATCACTTCGACTCTCGC
pGBKT7-SMXL8-F	CATGGAGGCCGAATTCATGCCAACGGCGGTGAAT
pGBKT7-SMXL8-R	GCAGGTCGACGGATCCCTGAGATTTTACAAAGAACAAGTCC
pGBKT7-DWA1-F	CATGGAGGCCGAATTCATGTACGGAGACGCTACAAA
pGBKT7-DWA1-R	GCAGGTCGACGGATCCCAATGAACTGCTACGAAATGT
pGBKT7-ABI5-F	CATGGAGGCCGAATTCATGGTAACTAGAGAAACGAAGTT
pGBKT7-ABI5-R	GCAGGTCGACGGATCCGAGTGGACAACTCGGGTT
pGADT7-DWA1-F	GGAGGCCAGTGAATTCATGTACGGAGACGCTACAAA
pGADT7-DWA1-R	CGAGCTCGATGGATCCCAATGAACTGCTACGAAATGT
pGADT7-DWA2-F	GGAGGCCAGTGAATTCATGCAAGGAGGATCATCG
pGADT7-DWA2-R	CGAGCTCGATGGATCCTCTTCTTGGCAGGAAAGG
pGADT7-ABI5-F	GGAGGCCAGTGAATTCATGGTAACTAGAGAAACGAAGTT
pGADT7-ABI5-R	CGAGCTCGATGGATCCGAGTGGACAACTCGGGTT
Y1H
pGADT7-SMXL6-F	GGAGGCCAGTGAATTCATGCCGACGCCGGTGACT
pGADT7-SMXL6-R	CGAGCTCGATGGATCCCCATATCACATCCACCTTCGCC
pGADT7-SMXL7-F	GGAGGCCAGTGAATTCATGCCGACACCAGTAACC
pGADT7-SMXL7-R	CGAGCTCGATGGATCCGATCACTTCGACTCTCGC
pGADT7-SMXL8-F	GGAGGCCAGTGAATTCATGCCAACGGCGGTGAAT
PGADT7-SMXL8-R	CGAGCTCGATGGATCCCTGAGATTTTACAAAGAACAAGTCC
SnRK2.3p-1:LacZ-F	TTCGAGCTCGGTACCGCGAAATAAGAAACAAAAAGAGT
SnRK2.3p-1:LacZ-R	TGCCTCGAGGTCGACTTAATGAAAAGGAGTGAATGGTG
SnRK2.3p-2:LacZ-F	TTCGAGCTCGGTACCAATCTCACCAGTAGGATGCTTAG
SnRK2.3p-2:LacZ-R	TGCCTCGAGGTCGACATGTGATGAAAGAATATTCGGTT
SnRK2.3p-3:LacZ-F	TTCGAGCTCGGTACCCCATCAACTAAATTAAAAAATGC
SnRK2.3p-3:LacZ-R	TGCCTCGAGGTCGACATCCATTTCTGATCACAAAAAGA
SnRK2.3p-3-1:LacZ-F	TTCGAGCTCGGTACCCAACATCAATCATCAAAACG
SnRK2.3p-3-1:LacZ-R	TGCCTCGAGGTCGACATCCATTTCTGATCACAAAAAG
SnRK2.3p-3-2:LacZ-F	TTCGAGCTCGGTACCGATACGAATTCTCAAAATGAGAAA
SnRK2.3p-3-2:LacZ-R	TGCCTCGAGGTCGACAAACGACAACGTTCAGTTGC
SnRK2.3p-3-3:LacZ-F	TTCGAGCTCGGTACCCCATCAACTAAATTAAAAAATG
SnRK2.3p-3-3:LacZ-R	TGCCTCGAGGTCGACCTCTGTATTTATCCGTTTCG
SnRK2.3p-3-1-1:LacZ-F	TTCGAGCTCGGTACCCAACATCAATCATCAAAACG
SnRK2.3p-3-1-1:LacZ-R	TGCCTCGAGGTCGACCCCCAAGAGATAAGGATTGT
SnRK2.3p-3-1-2:LacZ-F	TTCGAGCTCGGTACCCTTGGGGCAACCAATTAT
SnRK2.3p-3-1-2:LacZ-R	TGCCTCGAGGTCGACTGGAATCTAGGAAGAAGAAGAA
SnRK2.3p-3-1-3:LacZ-F	TTCGAGCTCGGTACCCTAGATTCCAGCGACTTAAC
SnRK2.3p-3-1-3:LacZ-R	TGCCTCGAGGTCGACATCCATTTCTGATCACAAAA
SnRK2.6p-1:LacZ-F	TTCGAGCTCGGTACCCAGGCCCCATTGTTTGTCA
SnRK2.6p-1:LacZ-R	TGCCTCGAGGTCGACATCCATTTTCTCCCCCTCTTT
SnRK2.6p-2:LacZ-F	TTCGAGCTCGGTACCCCCTTTTTATATACCGAAATAG
SnRK2.6p-2:LacZ-R	TGCCTCGAGGTCGACGTCAAAGCATGGGAGATAG
SnRK2.6p-3:LacZ-F	TTCGAGCTCGGTACCCATAAACAGTTTGCATTGAGTT
SnRK2.6p-3:LacZ-R	TGCCTCGAGGTCGACACCTCCATGTATTAATGACCAC
SnRK2.6p-3-1:LacZ-F	TTCGAGCTCGGTACCGATGATTAAAAAAAAAGTTTGCAG
SnRK2.6p-3-1:LacZ-R	TGCCTCGAGGTCGACACCTCCATGTATTAATGACCA
SnRK2.6p-3-2:LacZ-F	TTCGAGCTCGGTACCATTTTCATTCATTCACTAAAATC
SnRK2.6p-3-2:LacZ-R	TGCCTCGAGGTCGACCATCCACATGACGATTTT
SnRK2.6p-3-3:LacZ-F	TTCGAGCTCGGTACCCATAAACAGTTTGCATTGAGT
SnRK2.6p-3-3:LacZ-R	TGCCTCGAGGTCGACCTAAATAAAGGAAATTCATTGAC
SnRK2.6p-3-1-1:LacZ-F	TTCGAGCTCGGTACCGACATTTGTGGTAACTTG
SnRK2.6p-3-1-1:LacZ-R	TGCCTCGAGGTCGACACCTCCATGTATTAATGA
SnRK2.6p-3-1-2:LacZ-F	TTCGAGCTCGGTACCGTGATGATGAGTGCAACT
SnRK2.6p-3-1-2:LacZ-R	TGCCTCGAGGTCGACGTTACCACAAATGTCGAG
SnRK2.6p-3-1-3:LacZ-F	TTCGAGCTCGGTACCGATGATTAAAAAAAAAGTTTG
SnRK2.6p-3-1-3:LacZ-R	TGCCTCGAGGTCGACGAGTTGCACTCATCATCAC
Primers used in BiFC(Gateway)and GST-pull down
BiFC
pDNOR-SMXL6-F	GGGGACAAGTTTGTACAAAAAAGCAGGCTTCATGCCGACGCCGGTGACT
pDNOR-SMXL6-R	GGGGACCACTTTGTACAAGAAAGCTGG GTTCCATATCACATCCACCTTCGCC
pDNOR-SMXL7-F	GGGGACAAGTTTGTACAAAAAAGCAGGCTTCATGCCGACACCAGTAACC
pDNOR-SMXL7-R	GGGGACCACTTTGTACAAGAAAGCTGG GTTGATCACTTCGACTCTCGC
pDNOR-SMXL8-F	GGGGACAAGTTTGTACAAAAAAGCAGGCTTCATGCCAACGGCGGTGAAT
pDNOR-SMXL8-R	GGGGACCACTTTGTACAAGAAAGCTGG GTTCTGAGATTTTACAAAGAACAAGTCC
pDNOR-DWA1-F	GGGGACAAGTTTGTACAAAAAAGCAGGCTTCATGTACGGAGACGCTACAAA
pDNOR-DWA1-R	GGGGACCACTTTGTACAAGAAAGCTGG GTTCAATGAACTGCTACGAAATGT
Primers used in Y2H and Y1H
GST-pull down
GST-SMXL6-F	GGGGCCCCTGGGATCCATGCCGACGCCGGTGACT
GST-SMXL6-R	GTCGACCCGGGAATTCCCATATCACATCCACCTTCGCC
GST-SMXL7-F	GGGGCCCCTGGGATCCATGCCGACACCAGTAACC
GST-SMXL7-R	GTCGACCCGGGAATTCGATCACTTCGACTCTCGC
GST-SMXL8-F	GGGGCCCCTGGGATCCATGCCAACGGCGGTGAAT
GST-SMXL8-R	GTCGACCCGGGAATTCCTGAGATTTTACAAAGAACAAGTCC
His-DWA1-F	ATCGGATCCGAATTCATGTACGGAGACGCTACAAA
His-DWA1-R	CGCAAGCTTGTCGACAATGAACTGCTACGAAATGT
Primers used in Dual luciferase reporter system
Luc-ProSnRK2.3-F	GGGCGAATTGGGTACCCTTTGTATATCCGCATTTAC
Luc-ProSnRK2.3-R	TATCGATACCGTCGACTCACAAAAAGAGAAATTCG
Luc-ProSnRK2.6-F	GGGCGAATTGGGTACCGCAAACTCTTTTATAATATCAAGT
Luc-ProSnRK2.6-R	TATCGATACCGTCGACATCCATTTTCTCCCCCTC
62-sk-SMXL6-F	GGGCGAATTGGGTACCATGCCGACGCCGGTGACTT
62-sk-SMXL6-R	TATCGATACCGTCGACCCATATCACATCCACCTTCGCCC
62-sk-SMXL7-F	TAGAACTAGTGGATCCATGCCGACACCAGTAACCACGG
62-sk-SMXL7-R	GCTTGATATCGAATTCGATCACTTCGACTCTCGCC
62-sk-SMXL8-F	TAGAACTAGTGGATCCATGCCAACGGCGGTGAATT
62-sk-SMXL8-R	GCTTGATATCGAATTCCTACTGAGATTTTACAAAGAACC
62-sk-GFP-F	TAGAACTAGTGGATCCATGAGTAAAGGAGAAGAACTTTT
62-sk-GFP-R	GCTTGATATCGAATTCTTTGTATAGTTCATCCATGCC
Probes synthesized for EMSA
SnRK2.3P-3-1-2-a-F	CTTGGGGCAACCAATTATTGCCTTTTTTCTTCCTCTCTTTCCTTATTCGTT
SnRK2.3P-3-1-2-a-R	AACGAATAAGGAAAGAGAGGAAGAAAAAAGGCAATAATTGGTTGCCCCAAG
SnRK2.3P-3-1-2-b-F	CTCTTCTTGAAGATATTTTTCCATTTATTTTCTCGAATCTTCTTCTTCTT
SnRK2.3P-3-1-2-b-R	AAGAAGAAGAAGATTCGAGAAAATAAATGGAAAAATATCTTCAAGAAGAG
SnRK2.6P-3-1-1-a-F	GACATTTGTGGTAACTTGTTTTTCTTTTATTTTCCGTTTTTAAATGCGGAAACCCTT
SnRK2.6P-3-1-1-a-R	AAGGGTTTCCGCATTTAAAAACGGAAAATAAAAGAAAAACAAGTTACCACAAATGTC
SnRK2.6P-3-1-1-b-F	TTTATATACCGAAATAGAAAGTAAATCTTTTTAGTGGTCATTAATACATGGAGGT
SnRK2.6P-3-1-1-b-R	ACCTCCATGTATTAATGACCACTAAAAAGATTTACTTTCTATTTCGGTATATAAA
Primers used in RT-qPCR
ACT2 RT-F	CCAGAAGGATGCATATGTTGGTGA
ACT2 RT-R	GAGGAGCCTCGGTAAGAAGA
SNRK2.3 RT-F	TCCCGCTACCAGAATAAGCATACC
SNRK2.3 RT-R	TGGAACTGGCTTCCTGTGTTGC
SNRK2.6 RT-F	TGTTGCTGACCCTGCAAAGAGG
SNRK2.6 RT-R	TTTGGCCCGGTTGATCCGATTC
